# Supplementary material for: Vectorized dataset of roadside noise barriers in China using street view imagery
Source: Copernicus journal article supplement (doi:10.5194/essd-2022-19), 2022-04-11
Supplement: Supplementary file [file essd-2022-19-CC3-supplement.pdf]

## **Responses to RC1:**

*This paper creates a vectorized RNB dataset, which is an impressive work of good quality. This dataset will be beneficial for further studies as it is not always easy to create and find such data. Also, the street view image benchmark dataset is provided, which can be used as a training dataset for further work. There are some comments for the authors to consider:*

**Response:** We appreciate the favorable feedback and insightful comments from the reviewer. We believe the revised manuscript will address all the comments. Our responses to each comment are presented as follows.

*1. Do the authors see any possibility to extent the application of this approach to other regions outside of China in the future?*

**Response:** As far as we know, Google Street View covers a large range of places outside of China, in addition to having significant volunteer geographic information data. We will continue to collect such publically available data in the future, and if the possibility arises, we will create a larger vector road sound barrier dataset.

*2. I hope this dataset can be updated regularly to follow the frequency of Baidu Maps adaptation, and it is very beneficial, although the workload is enormous.*

**Response:** Thank you for bringing up this idea. As you might expect, given the frequency with which Baidu Street View images are updated, we gathered China-wide street view images again this year and updated the roadside noise barrier dataset, which we will update in the appropriate place in the article. In the future, we will update this dataset regularly to keep it up-to-date.

*3. Line 247-248: As said in this article, "where blank areas indicate no RNBs or lack of BSV images", from my perspective, it will be exciting and crucial to know exact information from blank areas, such as which cities lack RNBs or BSV images.*

**Response:** Thank you for suggestion. We will supplement this information in the revised manuscript.
